# Supplementary material for: The Association of Acquired T790M Mutation with Clinical Characteristics after Resistance to First-Line Epidermal Growth Factor Receptor Tyrosine Kinase Inhibitor in Lung Adenocarcinoma
Source: PubMed Central journal article supplement — Cancer Res Treat. 2018 Jan 4;50(4):1294–303. doi: 10.4143/crt.2017.512 (PMC6192936; doi:10.4143/crt.2017.512), 2018-01-04
Supplement: crt-2017-512-suppl3.pdf [file crt-2017-512-suppl3.pdf]

**S3 Table.** The association between patients' characteristics and first-line EGFR-TKI treatment

| Characteristic                       | First-line EGFR-TKI |           |           | p-value <sup>a)</sup> |
|--------------------------------------|---------------------|-----------|-----------|-----------------------|
|                                      | Gefitinib           | Erlotinib | Afatinib  |                       |
| Age (yr)                             |                     |           |           |                       |
| ≤ 60                                 | 42 (44.7)           | 52 (53.1) | 9 (69.2)  | 0.186                 |
| > 60                                 | 52 (55.3)           | 46 (46.9) | 4 (30.8)  |                       |
| Sex                                  |                     |           |           |                       |
| Male                                 | 25 (26.6)           | 45 (45.9) | 6 (46.2)  | 0.015                 |
| Female                               | 69 (73.4)           | 53 (54.1) | 7 (53.8)  |                       |
| Smoking status                       |                     |           |           |                       |
| Non-smokers                          | 77 (81.9)           | 75 (76.5) | 10 (76.9) | 0.676                 |
| Current/Former-smokers               | 17 (18.1)           | 23 (23.4) | 3 (23.1)  |                       |
| Baseline <i>EGFR</i> mutation status |                     |           |           |                       |
| 19Del                                | 53 (56.4)           | 51 (52.0) | 7 (53.8)  | 0.117                 |
| L858R                                | 37 (39.4)           | 43 (43.9) | 3 (23.1)  |                       |
| Others                               | 4 (4.2)             | 4 (4.1)   | 3 (23.1)  |                       |
| Best response of first line TKI      |                     |           |           |                       |
| Stable disease                       | 13 (13.8)           | 15 (15.3) | 1 (7.7)   | 0.856                 |
| Partial response                     | 81 (86.2)           | 83 (84.7) | 12 (92.3) |                       |
| PFS of first-line TKI                |                     |           |           |                       |
| ≤ 11 mo                              | 44 (46.8)           | 55 (56.1) | 8 (61.5)  | 0.353                 |
| > 11 mo                              | 50 (53.2)           | 43 (43.9) | 5 (38.5)  |                       |
| Re-biopsy site                       |                     |           |           |                       |
| Primary                              | 26 (27.7)           | 38 (38.8) | 4 (30.8)  | 0.259                 |
| Metastases                           | 68 (72.3)           | 60 (61.2) | 9 (69.2)  |                       |

EGFR, epidermal growth factor receptor; TKI, tyrosine kinase inhibitor; PFS, progression-free survival. <sup>a)</sup>By Fisher exact test.
